# Supplementary material
Source: HighWire-hosted journal article supplement (https://www.life-science-alliance.org/content/2/3/e201900328)
Supplement: inline-supplementary-material-5 [file inline-supplementary-material-5.pdf]

Western: IFNGR1 KIDS

12/14/18

for SORS1 manuscript

IFNGR1: LS Bio - CD119/IFNGR1 LS-C334260

1:81,000 - runs above 50kD

EXPOSURE TIMES

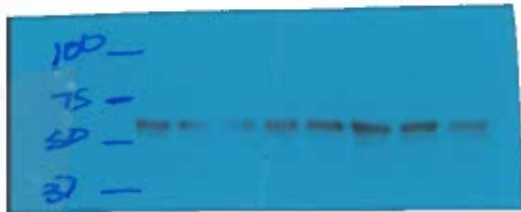

3 sec.

\* Looks as if there's a ladder but there's potentially a bubble - will run.

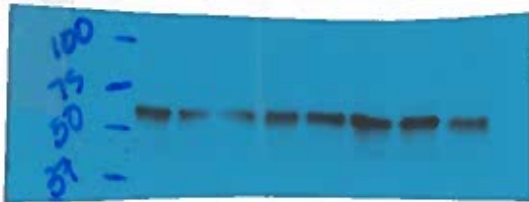

10 sec.

CP- CN- CB- CA- CP15- LP- LP15- C72-

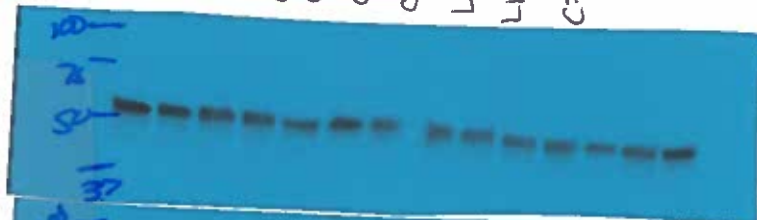

↳ maybe a bubble in the middle?

3 sec

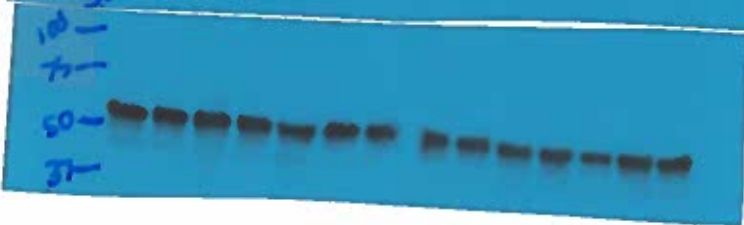

\* may also run w newly diluted sample as a comparison

10 sec.

LP- LP15- LP1- LP2- LP4- LP6- LP44- CP- CP1- CP1- CP2- CP44- CP6- CP89

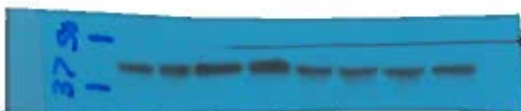

341  
55 sec

Running @ the correct weight?

~54 kD.

BACTIN

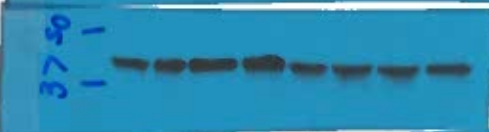

5 sec

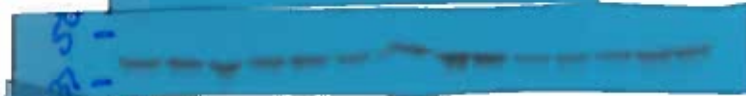

37.50

Def. have bubbles.

will run.

5 sec.

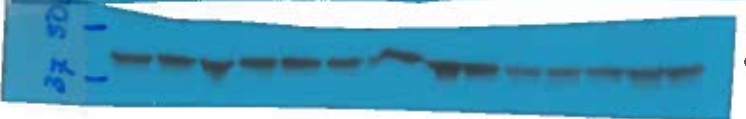

37.50  
55 sec.

Try #2 on other side - not much of a change
