# Supplementary material
Source: HighWire-hosted journal article supplement (https://www.life-science-alliance.org/content/2/3/e201900328)
Supplement: inline-supplementary-material-7 [file inline-supplementary-material-7.pdf]

Western: correct protein dilutions  
For SOCS1 manuscript

11-20-18

SOCS1: 1:500  
maybe ↑ dil. or add more  
protein next time. 15 μg of protein

(37 kD)

EXPOSURE TIMES

2 minutes.

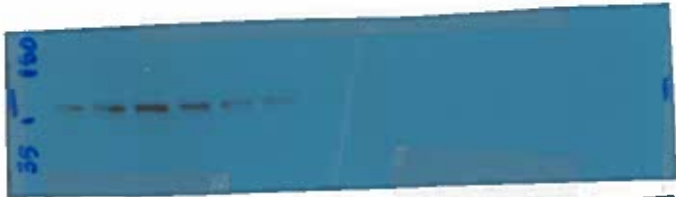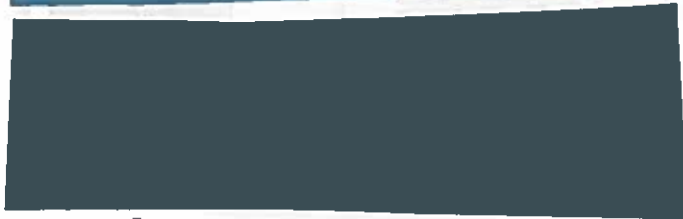

LP-  
LP15m  
LP1h  
LP2h  
LP4h  
LP6h  
LP8h  
CP-  
CP15m  
CP1h  
CP2h  
CP4h  
CP6h  
CP8h

7 minutes \*

+/- IFNγ  
10ng/ml.

B-ACTIN: 1:7500 15 μg protein:

(42 kD)

EXPOSURE TIMES

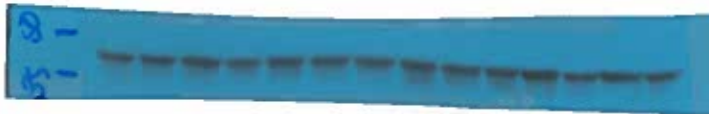

5 sec

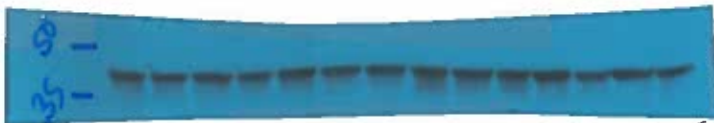

10 sec

LP-  
LP15m  
LP1h  
LP2h  
LP4h  
LP6h  
LP8h  
CP-  
CP15m  
CP1h  
CP2h  
CP4h  
CP6h  
CP8h

Possible SOCS1 induction w/ IFNγ is regulated  
by something else by protein in CMIS → or  
happens later.

LLC-luc SocS1 KD cells-

1/20/17

Verifying KD. By Protein

SocS1 Ab - Abcam. 1:400.  
 B-actin Ab - Sigma 1:10,000

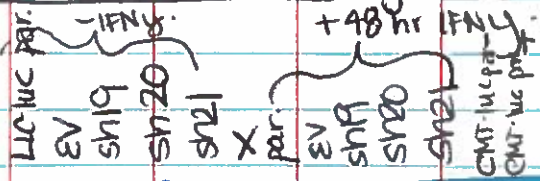

Used for pubs.

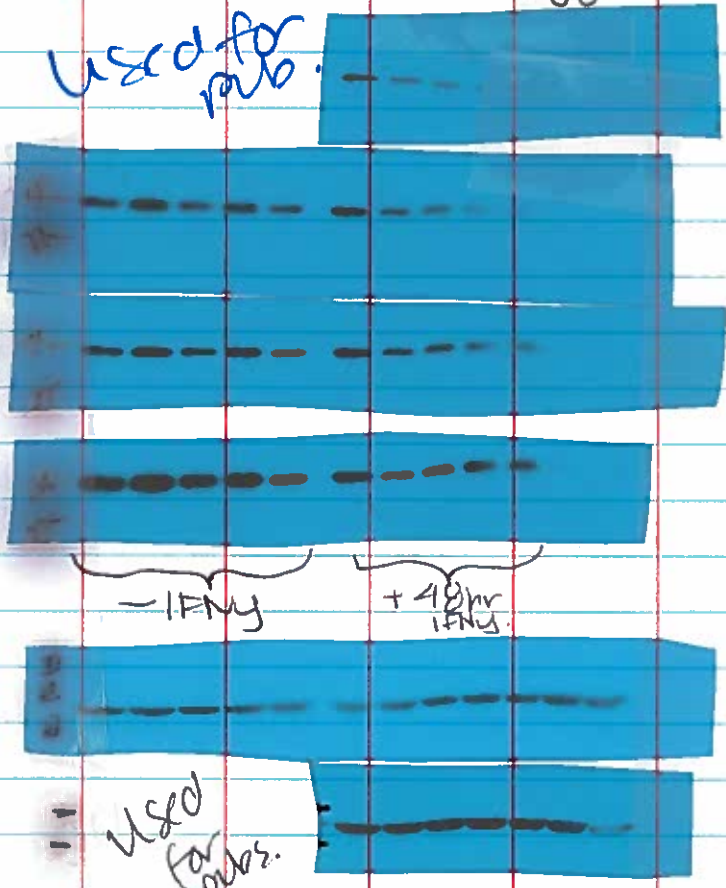

8 sec

20 sec

40 sec

1 min

Touch

3 sec

SocS1  
 \* Diff. exposure

predicted size is ~24 kD. but certain abs show it running between 50-37 kD.

B-actin  
 Diff. exposures.  
 ~42 kD.

Used for pubs.

Looks like sh19 is a KD compared to EV and the LC-luc parental line. and possibly sh21.

-should I single cell clone sh19?

LLC NTC - IFN $\gamma$   
 LLC NTC + 15M IFN $\gamma$   
 LLC NTC + 1hr IFN $\gamma$   
 SH19 - IFN $\gamma$   
 SH19 + 15M IFN $\gamma$   
 SH19 + 1hr IFN $\gamma$   
 SH20 - IFN $\gamma$   
 SH20 + 15M IFN $\gamma$   
 SH20 + 1hr IFN $\gamma$   
 SH21 - IFN $\gamma$   
 SH21 + 15M IFN $\gamma$   
 SH21 + 1hr IFN $\gamma$

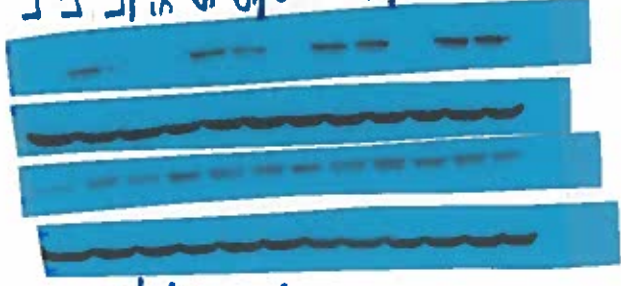

pSTAT1  
 B-actin for pSTAT1.  
 STAT1  
 B-actin for STAT1.

LLC NTC  
 LLC NTC  
 SH19  
 SH20  
 SH21

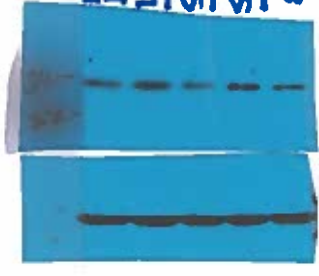

SOCS1 (Abcam)  
 B-actin for SOCS1.

all - IFN $\gamma$ .

using for CS/17  
 SOCS1 publication!
