# Supplementary material
Source: HighWire-hosted journal article supplement (https://www.life-science-alliance.org/content/2/3/e201900328)
Supplement: inline-supplementary-material-8 [file inline-supplementary-material-8.pdf]

pSTAT1 - LLC-lucs w/+/- IFNy

3.3.17-3.5.17

cell lines, older SoCS1 KD pools (revalidating)

pSTAT1 Exposures.

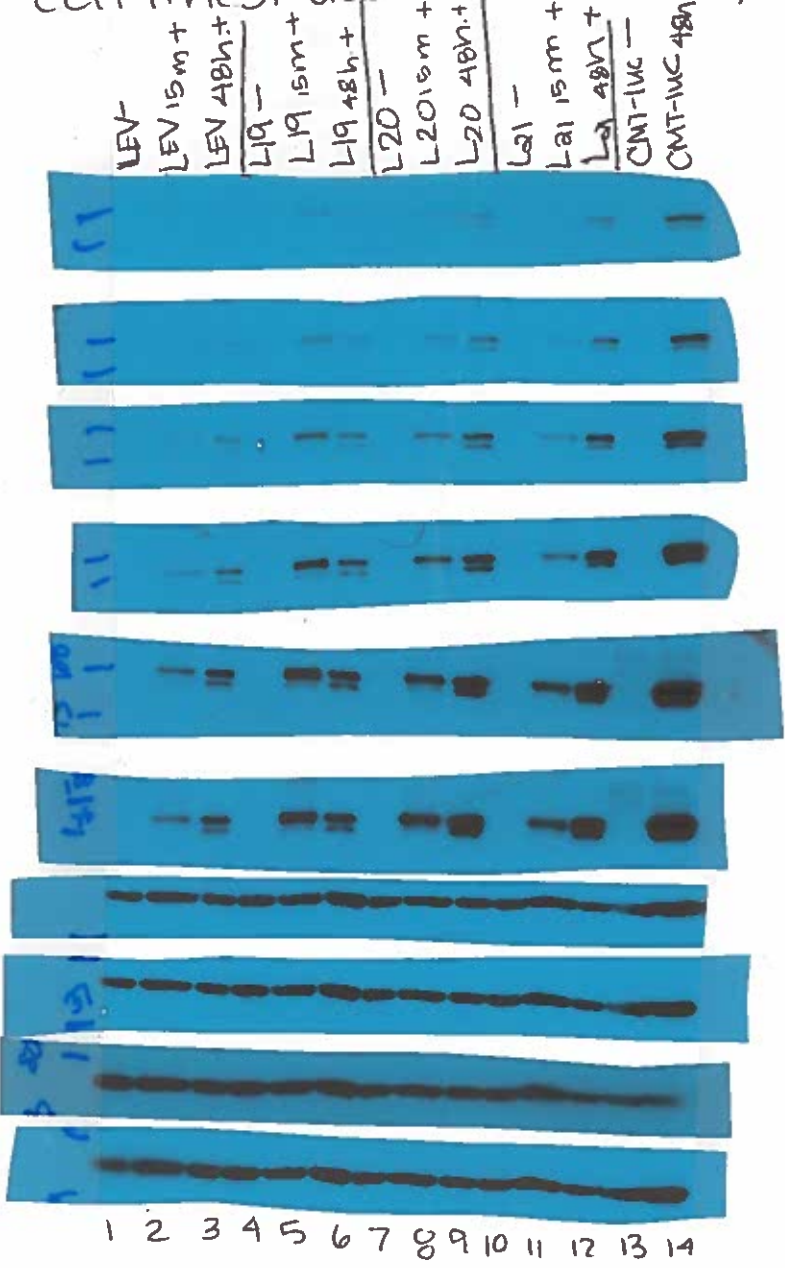

3 sec.  
1:1000.  
5 sec  
7 sec  
10 sec  
30 sec  
1 minute.

touch B. actin Exposure  
4 sec 1:10,000.  
2 sec  
3 sec.

The EVs induce pSTAT1 at 15m (1 isoform phosphorylated) while @ 48h both isoforms are phosphorylated. sh19, sh20 and sh21 all induce pSTAT1 at 15m and at 48h more robustly than EV ctrl and to a more similar degree to CMTs w/48h of IFNy treatment. This indicates there is a greater magnitude of IFNy signaling as a function of SoCS1 KD in LLC-lucs. Note → these cells were plated @ the same confluency and all treated at the same time. No media was changed, nor IFNy added more than once.

STAT1 - LLC - luc w/ +/- IFN $\gamma$  3.3.11-35.11  
 cell lines: older SOCS1 KD pools (revalidation)

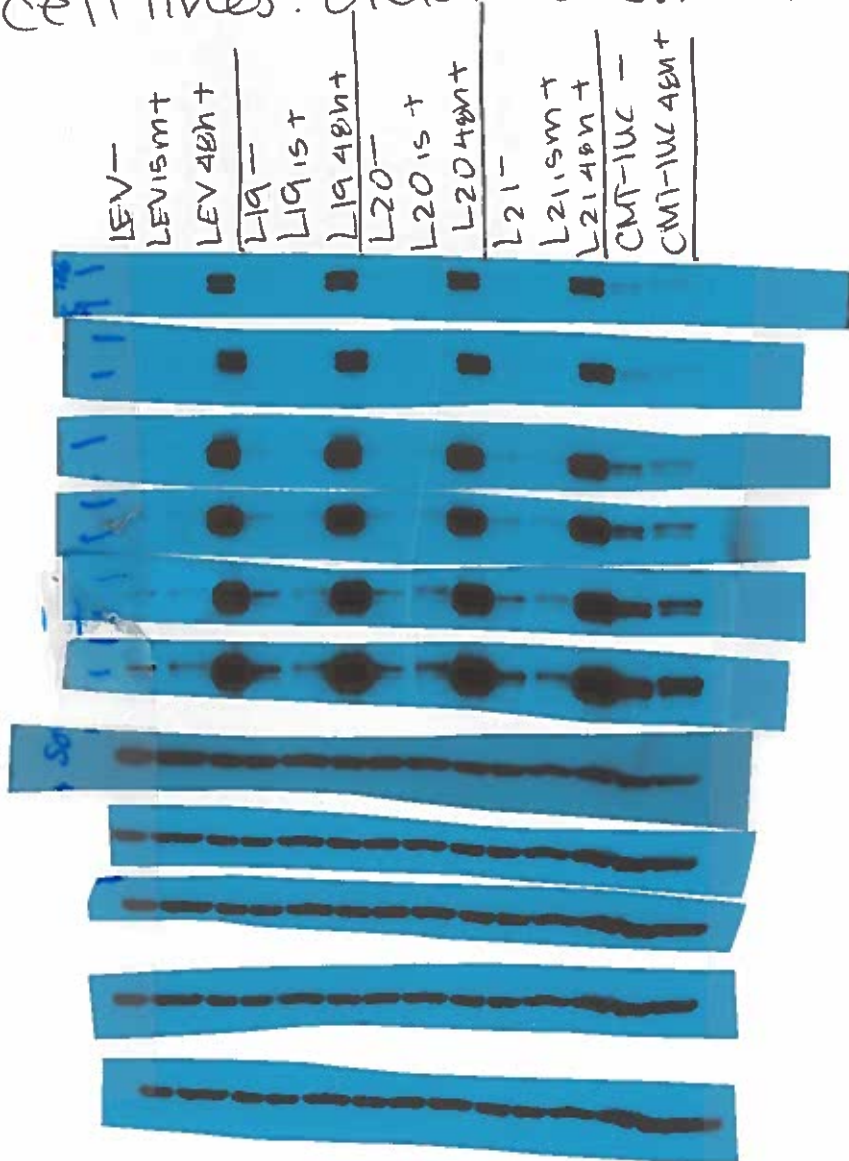

U STAT 1 exposures  
 → touch  
 → 2 sec  
 → 5 sec  
 → 10 sec  
 → 20 sec  
 → 45 sec

B-actin exposure

\* all touch.

Interesting that CMTs. have high USTAT1 at both baseline & after 48h IFN $\gamma$ , but not as much as all the LLC-luc cells. Seems like there are similar USTAT1 levels by 48h in LLC-luc EV ctrl and KDs. However, it's possible that sh19 and sh21 have high USTAT1 at baseline compared to EV ctrl. Also looks like there's increasing levels of USTAT1 in KDs vs EV ctrl by 15 minutes, but less than at baseline perhaps indicates slightly varied transcription programming due to KO of SOCS1.
